# Supplementary material for: Mapping molecular landmarks of human skeletal ontogeny and pluripotent stem cell-derived articular chondrocytes
Source: PubMed Central journal article supplement (PMC6128860; doi:10.1038/s41467-018-05573-y), 2018-09-07
Supplement: 41467_2018_5573_MOESM2_ESM.pdf [file 41467_2018_5573_MOESM2_ESM.pdf]

## Description of Additional Supplementary Files

**File Name: Supplementary Data 1**

**Description:** Genes significantly differentially expressed between 17 WPC BMPR1B- and BMPR1B+ presumptive articular chondrocytes. Positive sign indicates enrichment in BMPR1B- cells.

**File Name: Supplementary Data 2**

**Description:** Gene modules defined by WGCNA performed on fetal 17 WPC tissues.

**File Name: Supplementary Data 3**

**Description:** Expression levels (transcripts per million, TPM) for membrane proteins and transcription factors as well as GO terms enriched in the yellow (chondrocyte) module.

**File Name: Supplementary Data 4**

**Description:** Expression levels (transcripts per million, TPM) for membrane proteins and transcription factors as well as GO terms enriched in the green (ligamentocyte) module.

**File Name: Supplementary Data 5**

**Description:** Expression levels (transcripts per million, TPM) for membrane proteins and transcription factors as well as GO terms enriched in the turquoise (myoblast) module.

**File Name: Supplementary Data 6**

**Description:** Expression levels (transcripts per million, TPM) for membrane proteins and transcription factors as well as GO terms enriched in the brown (osteoblast) module.

**File Name: Supplementary Data 7**

**Description:** Expression levels (transcripts per million, TPM) for membrane proteins and transcription factors as well as GO terms enriched in the blue (tenocyte) module.

**File Name: Supplementary Data 8**

**Description:** Transcription factor binding motifs enriched in week 17 WGCNA modules using OPPOSSUM. Z scores and Fisher scores as measures of significance are listed.

**File Name: Supplementary Data 9**

**Description:** Gene modules defined by WGCNA performed across 4 stages of human cartilage ontogeny.

**File Name: Supplementary Data 10**

**Description:** Genes significantly differentially enriched in Fetal 17 WPC vs. Adolescent chondrocytes ( $p < 0.01$ ). Negative sign indicates enrichment in fetal cells.

**File Name: Supplementary Data 11**

**Description:** Genes significantly differentially enriched in Adolescent vs. Fetal 17 WPC chondrocytes ( $p < 0.01$ ). Positive sign indicates enrichment in adolescent cells.

**File Name: Supplementary Data 12**

**Description:** Genes significantly differentially enriched in Adolescent vs. Adult chondrocytes ( $p < 0.01$ ). Positive sign indicates enrichment in adolescent cells.

**File Name: Supplementary Data 13**

**Description:** Genes significantly differentially enriched in Adult vs. Adolescent chondrocytes ( $p < 0.01$ ). Negative sign indicates enrichment in adult cells.

**File Name: Supplementary Data 14**

**Description:** Genes significantly differentially enriched in Fetal 17 WPC vs. Adult chondrocytes ( $p < 0.05$ ). Positive sign indicates enrichment in fetal cells.

**File Name: Supplementary Data 15**

**Description:** Genes significantly differentially enriched in embryonic 5-6 WPC vs. fetal 17 WPC chondrocytes ( $p < 0.05$ ). Negative sign indicates enrichment in embryonic cells.

**File Name: Supplementary Data 16**

**Description:** Transcription factor binding motifs enriched across human cartilage ontogeny using OPPOSSUM. Z scores and Fisher scores as measures of significance are listed.

**File Name: Supplementary Data 17**

**Description:** Genes significantly differentially enriched in Mouse vs. Human chondrocytes ( $p < 0.01$ ). Positive sign indicates enrichment in mouse cells.

**File Name: Supplementary Data 18**

**Description:** Genes significantly differentially enriched in Human vs. Mouse chondrocytes ( $p < 0.01$ ). Negative sign indicates enrichment in human cells.

**File Name: Supplementary Data 19**

**Description:** Genes significantly differentially expressed in d14 PSC-derived vs. d60 PSC-derived chondrocytes ( $p < 0.05$ ). Negative sign indicates enrichment in d14 cells.

**File Name: Supplementary Data 20**

**Description:** Genes significantly differentially enriched in adult pig ITGA4<sup>-</sup>BMPR1B<sup>-</sup> articular chondrocytes vs. CD146<sup>+</sup> synovial pericytes ( $p < 0.05$ ). Positive sign indicates enrichment in ITGA4<sup>-</sup>BMPR1B<sup>-</sup> cells.

**File Name: Supplementary Data 21**

**Description:** Genes significantly differentially enriched in adult pig ITGA4<sup>-</sup>BMPR1B<sup>+</sup> articular chondrocytes vs. CD146<sup>+</sup> synovial pericytes ( $p < 0.05$ ). Positive sign indicates enrichment in ITGA4<sup>-</sup>BMPR1B<sup>+</sup> cells.

**File Name: Supplementary Data 22**

**Description:** Genes significantly differentially enriched in adult pig ITGA4<sup>+</sup>BMPR1B<sup>-</sup> articular chondrocytes vs. CD146<sup>+</sup> synovial pericytes ( $p < 0.05$ ). Positive sign indicates enrichment in ITGA4<sup>+</sup>BMPR1B<sup>-</sup> cells.

**File Name: Supplementary Data 23**

**Description:** Genes significantly differentially enriched in adult pig ITGA4<sup>+</sup>BMPR1B<sup>+</sup> articular chondrocytes vs. CD146<sup>+</sup> synovial pericytes ( $p < 0.05$ ). Positive sign indicates enrichment in ITGA4<sup>+</sup>BMPR1B<sup>+</sup> cells.

**File Name: Supplementary Data 24**

**Description:** Genes significantly differentially enriched in adult pig ITGA4<sup>-</sup>BMPR1B<sup>+</sup> vs. ITGA4<sup>-</sup>BMPR1B<sup>-</sup> articular chondrocytes ( $p < 0.05$ ). Positive sign indicates enrichment in ITGA4<sup>-</sup>BMPR1B<sup>+</sup> cells.

**File Name: Supplementary Data 25**

**Description:** Genes significantly differentially enriched in adult pig ITGA4<sup>+</sup>BMPR1B<sup>-</sup> vs. ITGA4<sup>-</sup>BMPR1B<sup>-</sup> articular chondrocytes ( $p < 0.05$ ). Positive sign indicates enrichment in ITGA4<sup>+</sup>BMPR1B<sup>-</sup> cells.

**File Name: Supplementary Data 26**

**Description:** Genes significantly differentially enriched in adult pig ITGA4<sup>+</sup>BMPR1B<sup>+</sup> vs. ITGA4<sup>-</sup>BMPR1B<sup>-</sup> articular chondrocytes ( $p < 0.05$ ). Positive sign indicates enrichment in ITGA4<sup>+</sup>BMPR1B<sup>+</sup> cells.

**File Name: Supplementary Data 27**

**Description:** Genes significantly differentially enriched in adult pig ITGA4<sup>+</sup>BMPR1B<sup>-</sup> vs. ITGA4<sup>-</sup>BMPR1B<sup>+</sup> articular chondrocytes ( $p < 0.05$ ). Positive sign indicates enrichment in ITGA4<sup>+</sup>BMPR1B<sup>-</sup> cells.

**File Name: Supplementary Data 28**

**Description:** Genes significantly differentially enriched in adult pig ITGA4<sup>+</sup>BMPR1B<sup>+</sup> vs. ITGA4<sup>-</sup>BMPR1B<sup>+</sup> articular chondrocytes ( $p < 0.05$ ). Positive sign indicates enrichment in ITGA4<sup>+</sup>BMPR1B<sup>+</sup> cells.

**File Name: Supplementary Data 29**

**Description:** Genes significantly differentially enriched in adult pig ITGA4<sup>+</sup>BMPR1B<sup>-</sup> vs. ITGA4<sup>+</sup>BMPR1B<sup>+</sup> articular chondrocytes ( $p < 0.05$ ). Positive sign indicates enrichment in ITGA4<sup>+</sup>BMPR1B<sup>-</sup> cells.

**File Name: Supplementary Data 30**

**Description:** Genes present in each chromatin state in fetal 17 WPC chondrocytes. Active promoter = H3K4me4, H3K27Ac; Promoter proximal = H3K4me1, H3K4me3 and H3K27Ac; Polycomb repressed = H3K27me3.

**File Name: Supplementary Data 31**

**Description:** Genes present in each chromatin state in adult articular chondrocytes. Active promoter = H3K4me4, H3K27Ac; Promoter proximal = H3K4me1, H3K4me3 and H3K27Ac; Polycomb repressed = H3K27me3.

**File Name: Supplementary Data 32**

**Description:** Genes present in each chromatin state in d14 PSC-derived chondrocytes. Active promoter = H3K4me4, H3K27Ac; Promoter proximal = H3K4me1, H3K4me3 and H3K27Ac; Polycomb repressed = H3K27me3.

**File Name: Supplementary Data 33**

**Description:** Genes present in each chromatin state in d60 PSC-derived chondrocytes. Active promoter = H3K4me4, H3K27Ac; Promoter proximal = H3K4me1, H3K4me3 and H3K27Ac; Polycomb repressed = H3K27me3.

**File Name: Supplementary Data 34**

**Description:** Genes, and GO terms, enriched commonly in fetal 17 WPC chondrocytes vs. embryonic 5-6 WPC pre-chondrocytes and d60 vs. d14 PSC-derived chondrocytes.

**File Name: Supplementary Data 35**

**Description:** Genes, and GO terms, enriched commonly in embryonic 5-6 WPC pre-chondrocytes vs. fetal 17 WPC chondrocytes and d14 vs. d60 PSC-derived chondrocytes.

**File Name: Supplementary Data 36**

**Description:** Metrics for samples sequenced including total reads and mapped reads.
